# Supplementary material for: Electrochemically chopped WS2 quantum dots as an efficient and stable electrocatalyst for water reduction
Source: Royal Society of Chemistry journal article supplement (doi:10.1039/c8cy02168f), 2018-11-22
Supplement: c8cy02168f1.pdf [file c8cy02168f1.pdf]

## Supporting Information

---

### **Electrochemically Chopped WS<sub>2</sub> Quantum Dots as an Efficient and Stable Electrocatalyst for Water Reduction**

*S. Anantharaj<sup>†,‡,§</sup>, Manila O. Valappil<sup>†,‡,§</sup>, K. Karthick<sup>†,‡</sup>, Vijayamohanan K. Pillai<sup>†,‡</sup>, Subbiah Alwarappan<sup>†,‡,\*</sup> and Subrata Kundu<sup>†,‡,\*</sup>*

<sup>†</sup>Academy of Scientific and Innovative Research (AcSIR), CSIR-Central Electrochemical Research Institute (CSIR-CECRI) Campus, New Delhi, India

<sup>‡</sup>CSIR-Central Electrochemical Research Institute (CECRI), Karaikudi-630003, Tamil Nadu, India

<sup>§</sup>These authors have contributed equally.

*E-mail: [kundu.subrata@gmail.com](mailto:kundu.subrata@gmail.com); [salwarap@gmail.com](mailto:salwarap@gmail.com).*

## Reagents and Instruments

Sulphuric acid was purchased from RANKEM India. Commercial Pt/C 20 wt.% catalyst and 5 % Nafion suspension in alcohol water mixture were obtained from Sigma Aldrich. High purity WS<sub>2</sub> (99.9%) was procured from Alfa Aesar. LiClO<sub>4</sub> and the solvent propylene carbonate were procured from Merck and Thermofischer Scientific. Hg/HgSO<sub>4</sub> reference electrode was purchased from CH Instruments Pvt. Ltd. Deionized water (18.2 MΩcm<sup>-2</sup>) was used for the entire electrochemical study wherever required. TEM analysis was done with TECNAI made which operates with 200 kV bias. The Energy Dispersive X-ray Spectroscopy (EDS) analysis was done with the HR-TEM instrument (TECNAI) with a separate EDS detector connected to that instrument. The XRD analysis was done with a scanning rate of 5° min<sup>-1</sup> using a Bruker X-ray powder diffractometer (XRD) with Cu K<sub>α</sub> radiation ( $\lambda = 0.154$  nm). X-ray photoelectron spectroscopic (XPS) analysis was performed using a Theta Probe AR-XPS system (Thermo Fisher Scientific, UK). UV-Vis and PL spectra were acquired with UNICO double beam spectrophotometer. Electrochemical analyzer AUTOLAB version AUT86853 was used for the entire electrochemical characterization.

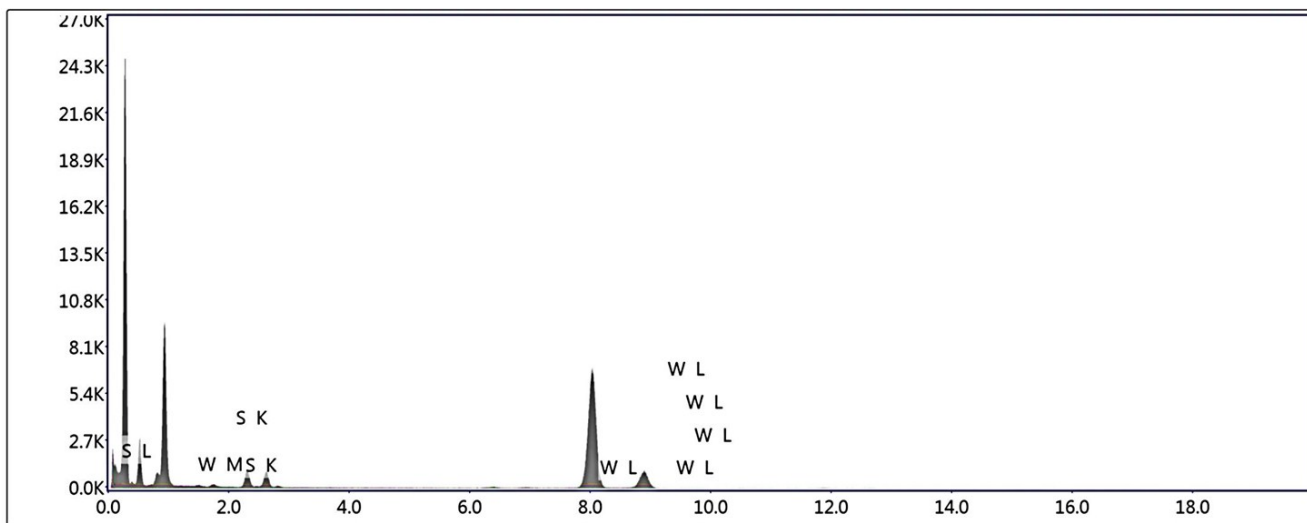

Lsec: 655.2 0 Cnts 0.000 keV Det: Apollo XLT2 SUTW Det

**Fig. S1:** EDS spectrum of WS<sub>2</sub> QDs showing the presence of W and S for various shells.

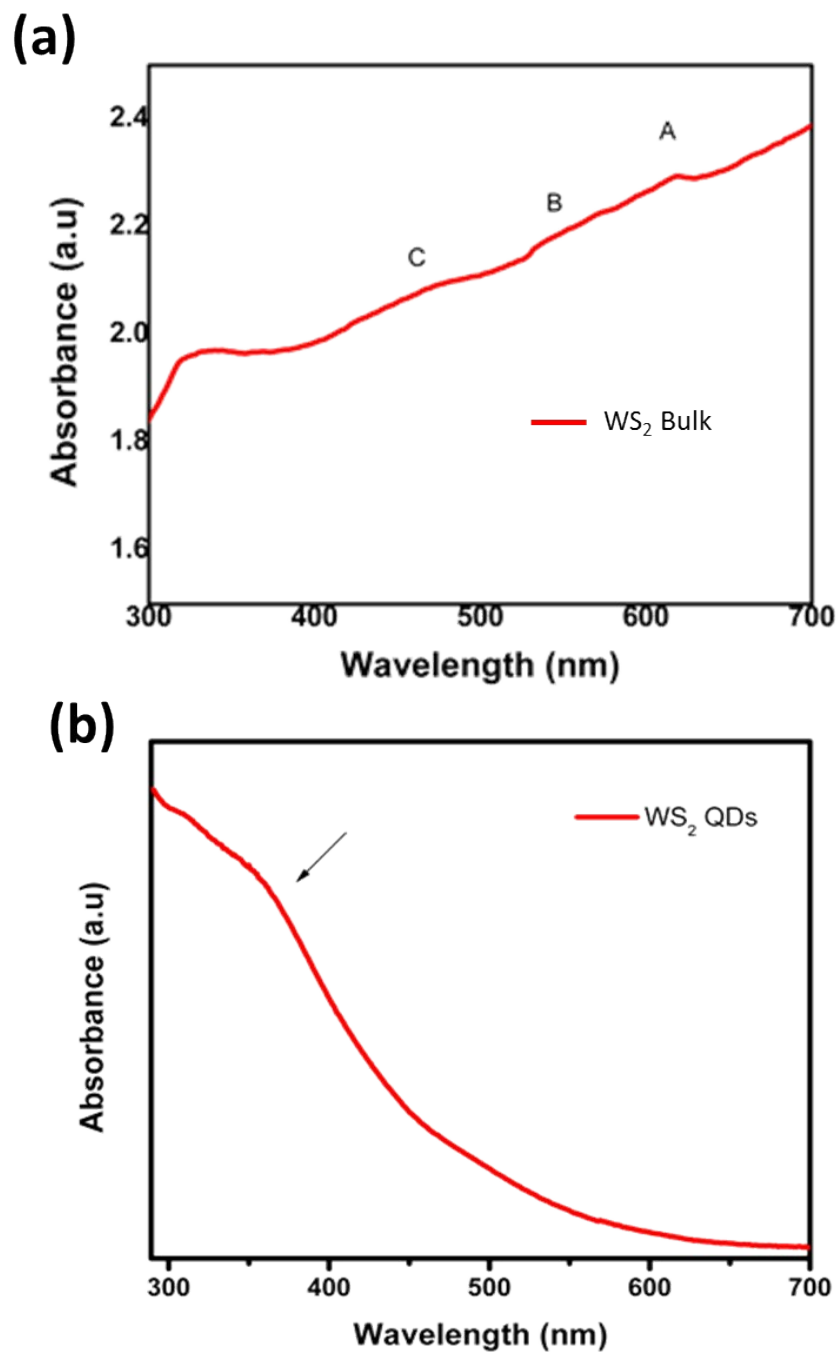

**Fig. S2:** (a-b)UV-Vis spectrum of Bulk WS<sub>2</sub> and WS<sub>2</sub> QDs showing differences in their absorption features.

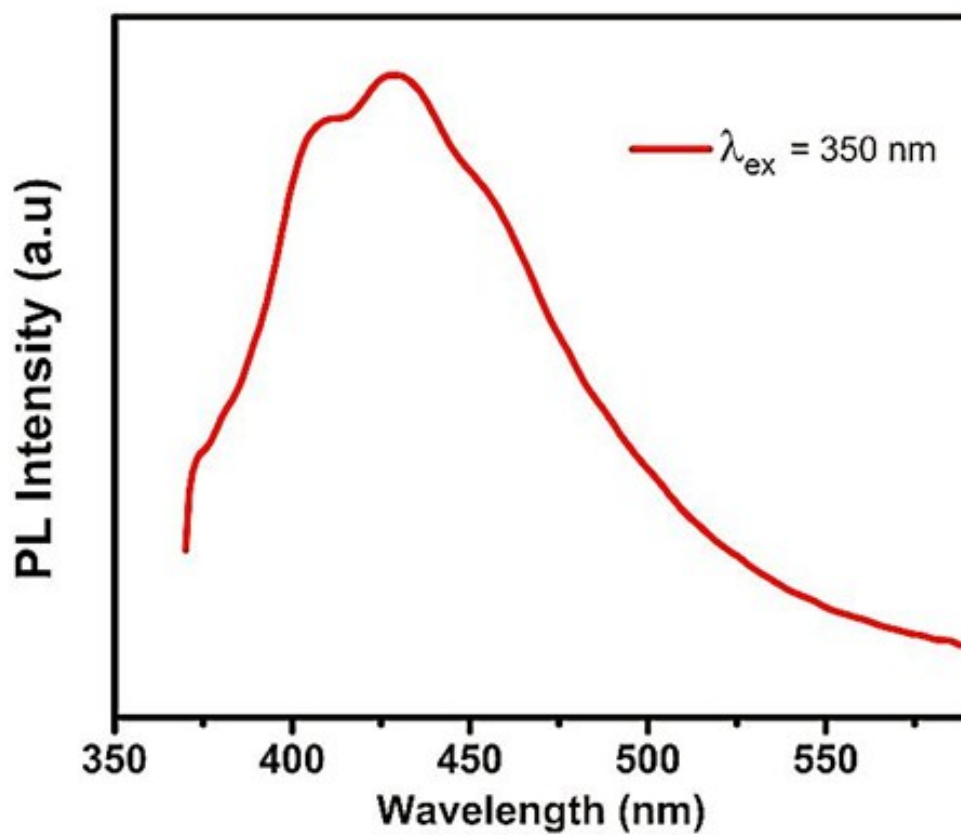

Fig. S3: PL spectrum of WS<sub>2</sub> QDs obtained with an exciting wavelength of 350 nm.

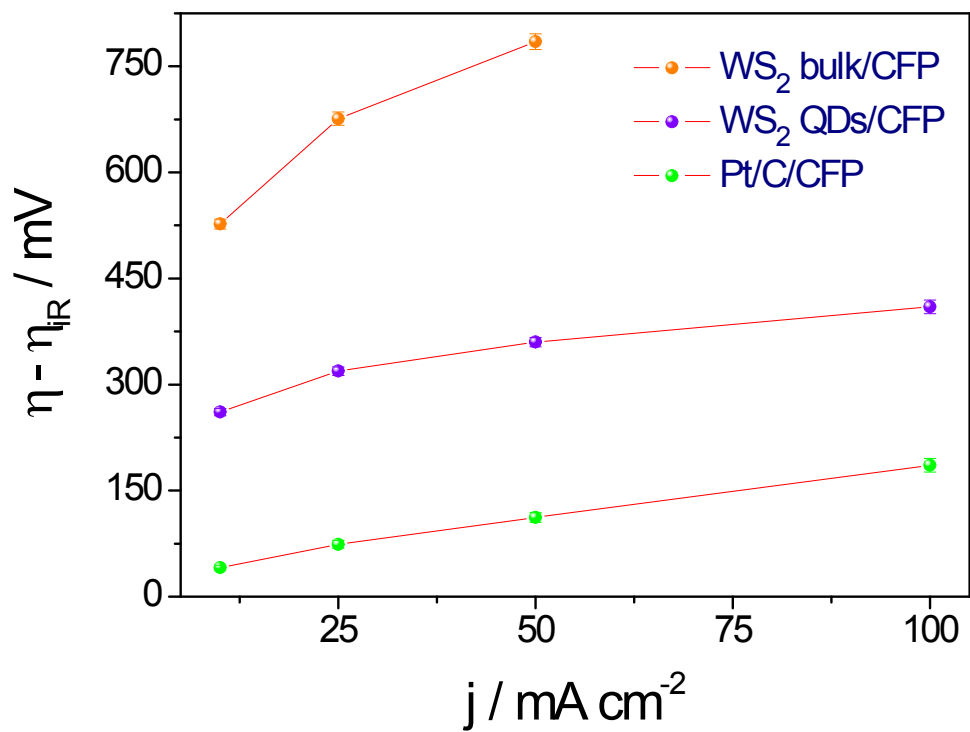

**Fig. S4:** Plot of  $j$  vs. *overpotential* measured at repeated experiments showing the high reproducibility with minimum magnitude of deviation.

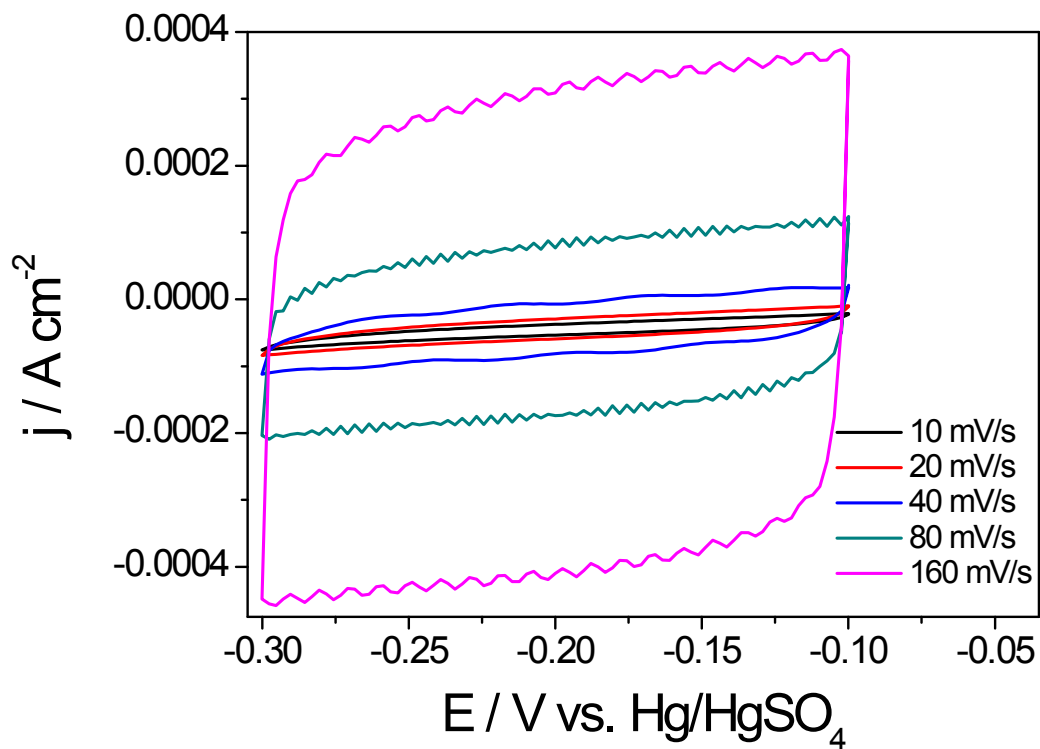

**Fig. S5:** CVs recorded for WS<sub>2</sub> QDs/CFP electrode in a non-faradaic region with increasing scan rate for the determination of ECSA from its double layer capacitance.

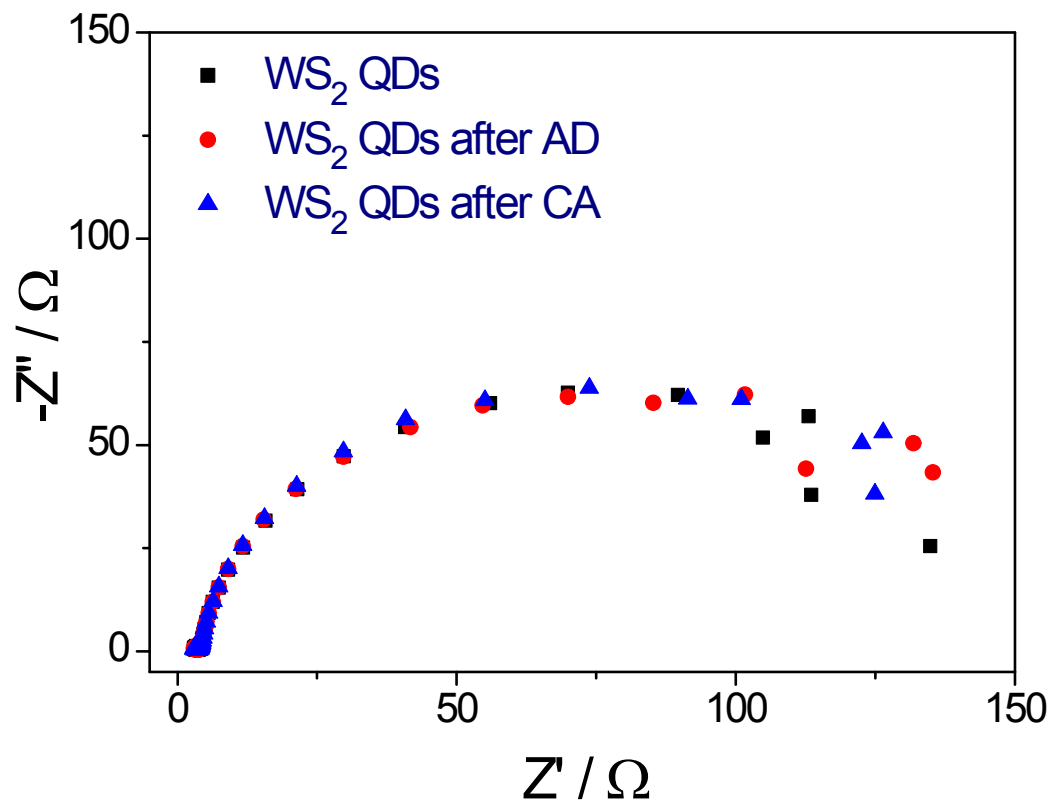

**Fig. S6:** Nyquist plots of  $WS_2$  QDs/CFP interface obtained before and after stability studies.



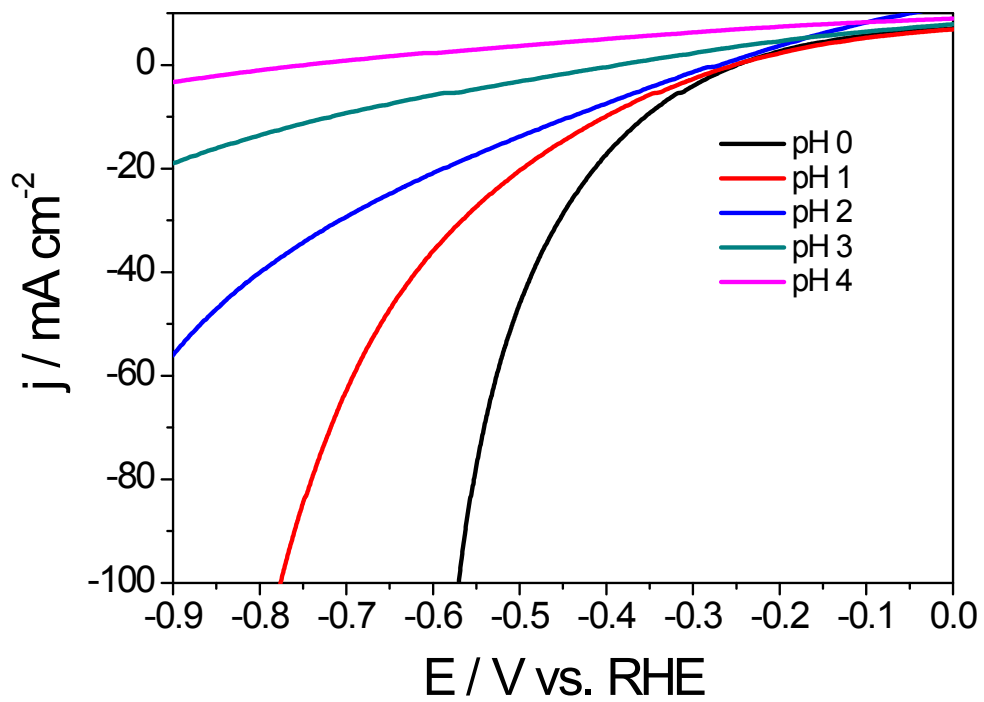

**Fig. S7:** pH dependent LSVs of  $\text{WS}_2$  QDs/CFP interface acquired at  $5 \text{ mV s}^{-1}$  without  $iR$  drop compensation.

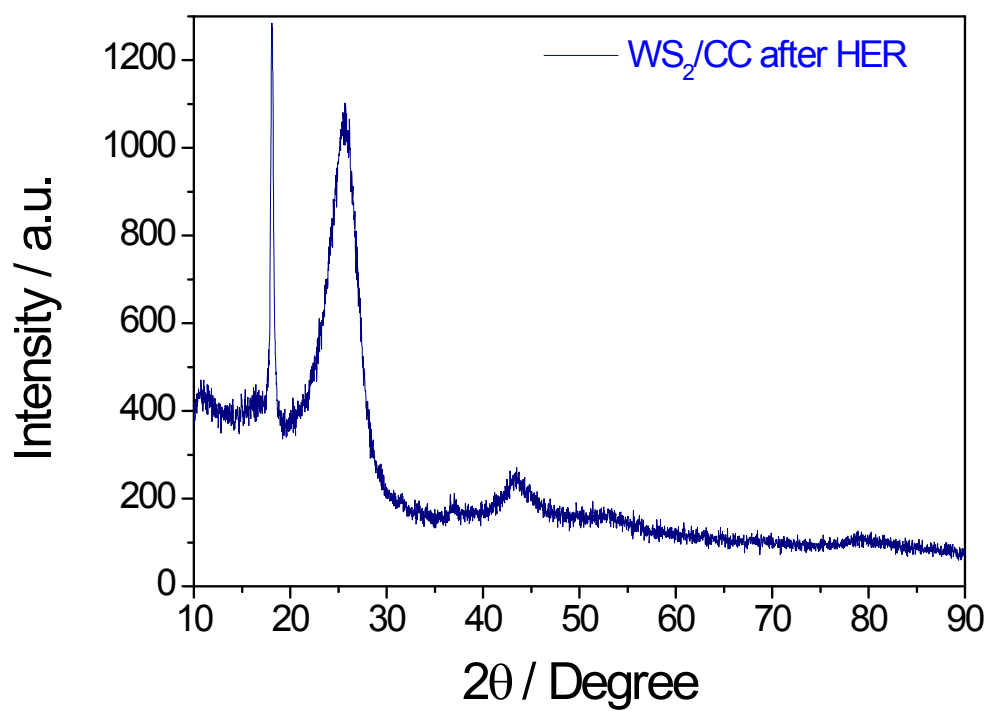

**Fig. S8:** XRD pattern of WS<sub>2</sub> QDs/CFP electrode after prolonged chronoamperometry.

**Table S1:** Results of the electrocatalytic HER study in comparison with other reports

| <i>Catalyst</i>                                                 | <i>Loading<br/>(mg cm<sup>-2</sup>)</i> | <i>Overpotential at<br/>10 mA cm<sup>-2</sup> (mV)</i> | <i>Tafel slope<br/>mV/dec</i> | <i>Reference</i>                                               |
|-----------------------------------------------------------------|-----------------------------------------|--------------------------------------------------------|-------------------------------|----------------------------------------------------------------|
| <b>Bulk WS<sub>2</sub> Sheets</b>                               | <b>0.205</b>                            | <b>522</b>                                             | <b>159</b>                    | <b><i>This work</i></b>                                        |
| <b>WS<sub>2</sub> QDs</b>                                       | <b>0.0132</b>                           | <b>255</b>                                             | <b>90</b>                     | <b><i>This work</i></b>                                        |
| WS <sub>2</sub> -CNT                                            | (a)                                     | 684                                                    | 182                           | <i>J. Mater. Chem. A</i> , 2015, 3, 14609–14616                |
| NiWS <sub>x</sub>                                               | (a)                                     | 340 (5 mA cm <sup>-2</sup> )                           | 96                            | <i>Energy Environ. Sci.</i> , 2013, 6, 2452–2459               |
| CoWS <sub>x</sub>                                               | (a)                                     | 238 (5 mA cm <sup>-2</sup> )                           | 78                            |                                                                |
| WS <sub>2</sub> -ND                                             | 0.0163                                  | ~120                                                   | 51                            | <i>ACS Nano</i> , 2016, 10, 2159–2166                          |
| WS <sub>2</sub> -NF                                             | 0.35                                    | ~410                                                   | 48                            | <i>Angew. Chem. Int. Ed.</i> 2014, 53, 7860–7863               |
| WS <sub>2</sub> -NF                                             | 1                                       | ~355                                                   | 200                           | <i>Nano Research</i> 2013, 6, 921–928                          |
| WS <sub>2</sub> @NCNF                                           | (a)                                     | 240                                                    | 110                           | <i>ACS Appl. Mater. Interfaces.</i> , 2015, 7, 28116–28121     |
| WS <sub>2</sub> -NR                                             | (a)                                     | 225                                                    | 68                            | <i>Adv. Energy Mater.</i> 2014, 4, 1301875                     |
| WS <sub>2</sub> -NS                                             | (a)                                     | ~215                                                   | 60                            | <i>Nature Materials.</i> 2013, 12, 850-853                     |
| WS <sub>2</sub> -NS                                             | 0.285                                   | 150                                                    | 138                           | <i>Applied Catalysis B: Environmental.</i> , 125 (2012) 59– 66 |
| WS <sub>2</sub> -NS on Au foil                                  | (a)                                     | ~325                                                   | 100-104                       | <i>Nano Research.</i> , 8, (2015) 2881-2890                    |
| amorphous NiWS                                                  | (a)                                     | 265                                                    | 55                            | <i>Applied Surface Science.</i> , 341 (2015) 149–156           |
| amorphous CoWS                                                  | (a)                                     | 330                                                    | 74                            |                                                                |
| WS <sub>2(1-x)</sub> Se <sub>2x</sub>                           | 0.21                                    | ~ 255                                                  | 105                           | <i>Acs Nano.</i> , 8 (2014), 8468-8476                         |
| WS <sub>2(1-x)</sub> Se <sub>2x</sub> NR                        | ~0.30± 0.02                             | 170                                                    | 68                            | <i>Adv. Funct. Mater.</i> 2015, 25, 6077–6083                  |
| WS <sub>2(1-x)</sub> Se <sub>2x</sub> on NiSe <sub>2</sub> foam | 5.4                                     | 88                                                     | 46.7                          | <i>Nano Lett.</i> 2016, 16, 7604–7609                          |
| WS <sub>2</sub> -G                                              | ~ 6                                     | 119                                                    | 43                            | <i>J. Mater. Chem. A</i> , 2016, 4, 9472–9476                  |
| WS <sub>2</sub> /rGO hybrid NS                                  | 0.4                                     | ~ 260                                                  | 58                            | <i>Angew. Chem. Int. Ed.</i> 2013, 52, 13751 –13754            |
| WS <sub>2</sub> -G                                              | (a)                                     | 229                                                    | 73                            | <i>Nanoscale</i> , 2015, 7, 14760–14765                        |
| (WS <sub>3-x</sub> )                                            | (a)                                     | 494                                                    | 43.7                          | <i>ACS Appl. Mater. Interfaces</i> 2016, 8, 3948–3957          |
| WSe <sub>2</sub>                                                | (a)                                     | 300                                                    | 77.4                          | <i>Nano Lett.</i> 2013, 13, 3426–3433                          |

Note: (a) - There is no information on the loading of the catalyst compared here. '~' denotes that the corresponding values were calculated from the available related data in the cited reports.
